# Supplementary material for: Emergence of Protein Fold Families through Rational Design
Source: PLOS journal article supplement (doi:10.1371/journal.pcbi.0020085), 2006-07-05
Supplement: S1 (10.1371/journal.pcbi.0020085.s001) [file journal.pcbi.0020085.s001]

**Table S1**. The weight of each energy terms (Methods).

| Energy wrights | The parameterized value |
| --- | --- |
| *WVDW-attr* | 1.00 |
| *WVDW-rep* | 0.87 |
| *Wsolv* | 0.73 |
| *Wbb-hbond* | 2.00 |
| *Wbb-sc-hbond* | 1.63 |
| *Wsc-hbond* | 1.84 |
| *W|aa* | 0.63 |
| *W,aa|rot* | 0.62 |
| *WCYS* | 2.00 |
| *WMET* | -0.49 |
| *WPHE* | 2.74 |
| *WILE* | 0.52 |
| *WLEU* | 0.57 |
| *WVAL* | -0.07 |
| *WTRP* | 4.32 |
| *WTYR* | 2.46 |
| *WALA* | -1.07 |
| *WGLY* | -1.41 |
| *WTHR* | -0.86 |
| *WSER* | -1.20 |
| *WGLN* | -0.22 |
| *WASN* | -1.15 |
| *WGLU* | -2.16 |
| *WASP* | -2.43 |
| *WHIS* | 0.88 |
| *WARG* | -0.04 |
| *WLYS* | -1.33 |
| *WPRO* | 0.94 |
